# Supplementary material for: Salt-inducible kinase 1 maintains HDAC7 stability to promote pathologic cardiac remodeling
Source: JCI journal article supplement (doi:10.1172/jci133753), 2020-02-27
Supplement: sd1 [file 1]

**Supplemental Figure 1:** (A-C) qRT-PCR expression for canonical heart failure associated genes. (n=4-6). Bars denote mean  $\pm$  SEM. (D) NRVM treated with HG or YKL (nM doses pictured) and immunostained for  $\alpha$ -actinin (green) and nuclei (blue) Scale = 40um. Vehicle image from Figure 1A is reshown. (E) Cell area of NRVM. (n=100). Bars denote mean  $\pm$  SD. Control measurements from Figure 1B are reshown. \*P<0.05, \*\*P<0.01, \*\*\*P<0.001, \*\*\*\*P<0.0001 by one-way ANOVA with Tukey's multiple comparisons test.

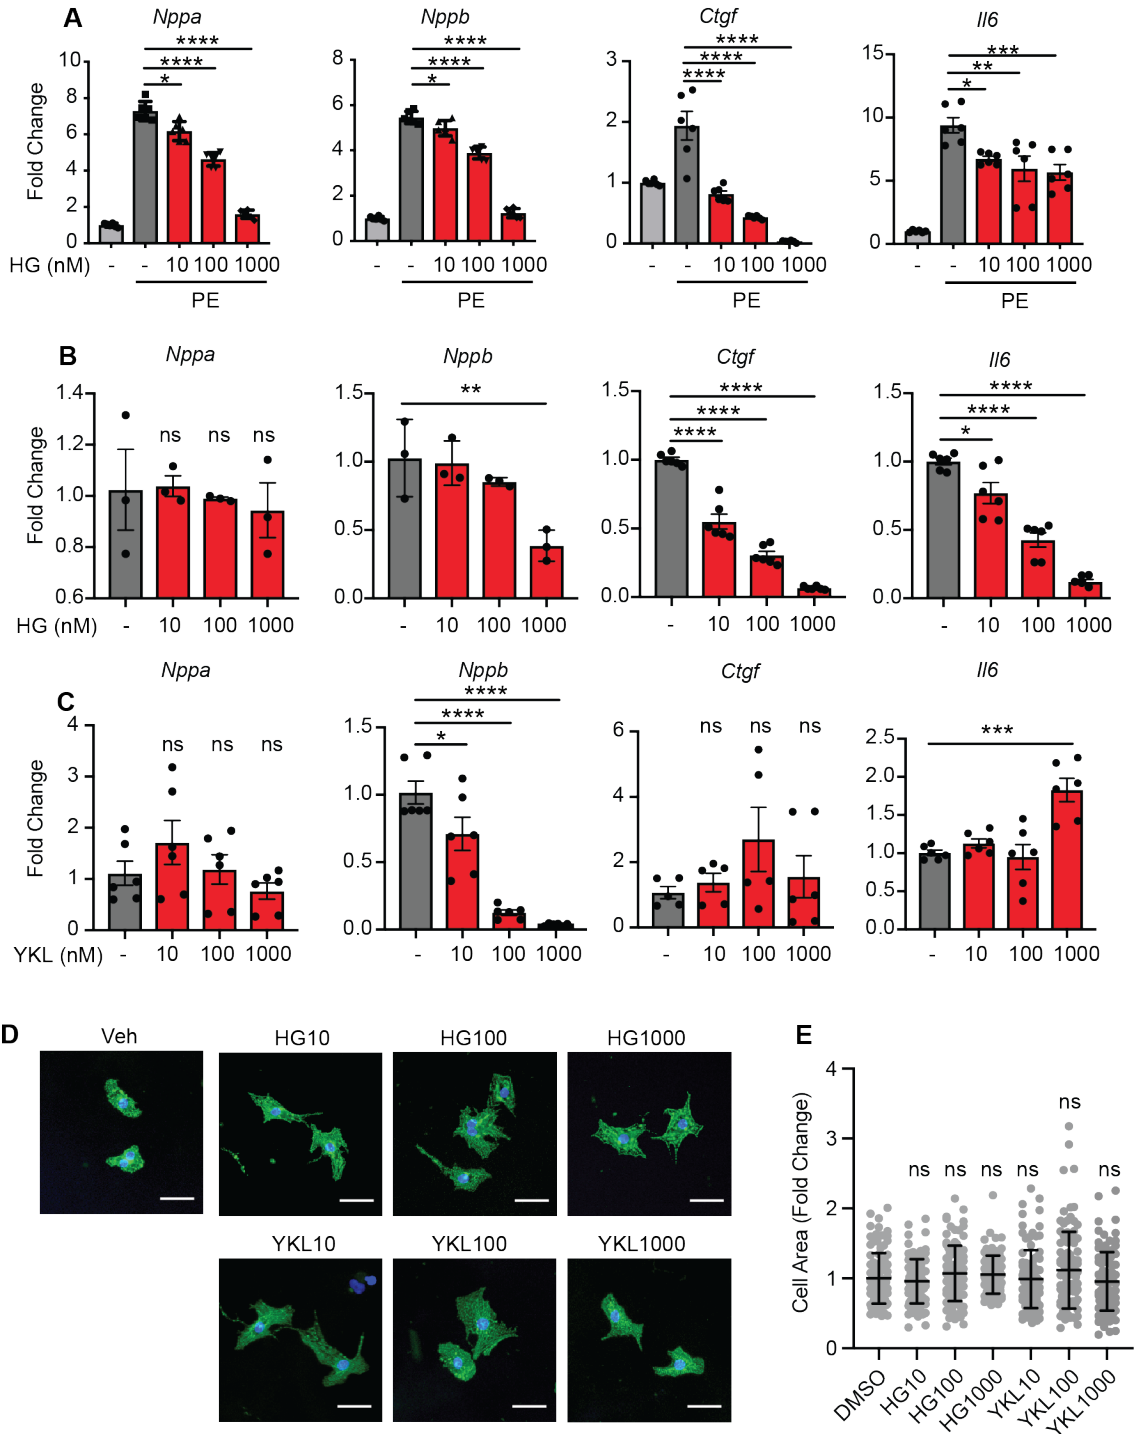

**Supplemental Figure 2:** (A) NRVM treated with siRNAs against *Sik1* or *Sik3* and immunostained for  $\alpha$ -actinin (green) and nuclei (blue) Scale = 40um. Scramble image from Figure 2B is reshown. (B) qRT-PCR expression for *Sik1* and *Sik3* in setting of siSik1 or siSik3 transfection (n=4). (C) Representative H&E staining on cardiac tissue from WT or *Sik1*<sup>-/-</sup> mice. Scale=3mm. (D) In vitro kinase assay with recombinant HDAC7 and GST-tagged SIK1 + YKL-05-099 (1uM) (representative western blots, n=3). (E) Cos7 cells were co-transfected with either WT HDAC7 or S155A HDAC7 + WT SIK1 plasmid or empty carrier plasmid. Cells were lysed 48 hours post transfection and assayed by western blotting (representative western blots, n=3). (F, G) qRT-PCR from NRVM infected with adenovirus expressing SIK1 followed by transfection of siRNA probes against *Hdac7* or scramble control (n=6). Data are shown as means  $\pm$  SEM unless noted. \*\*P<0.01, \*\*\*P<0.001, \*\*\*\*P<0.0001 by one-way ANOVA with Tukey's multiple comparisons test.

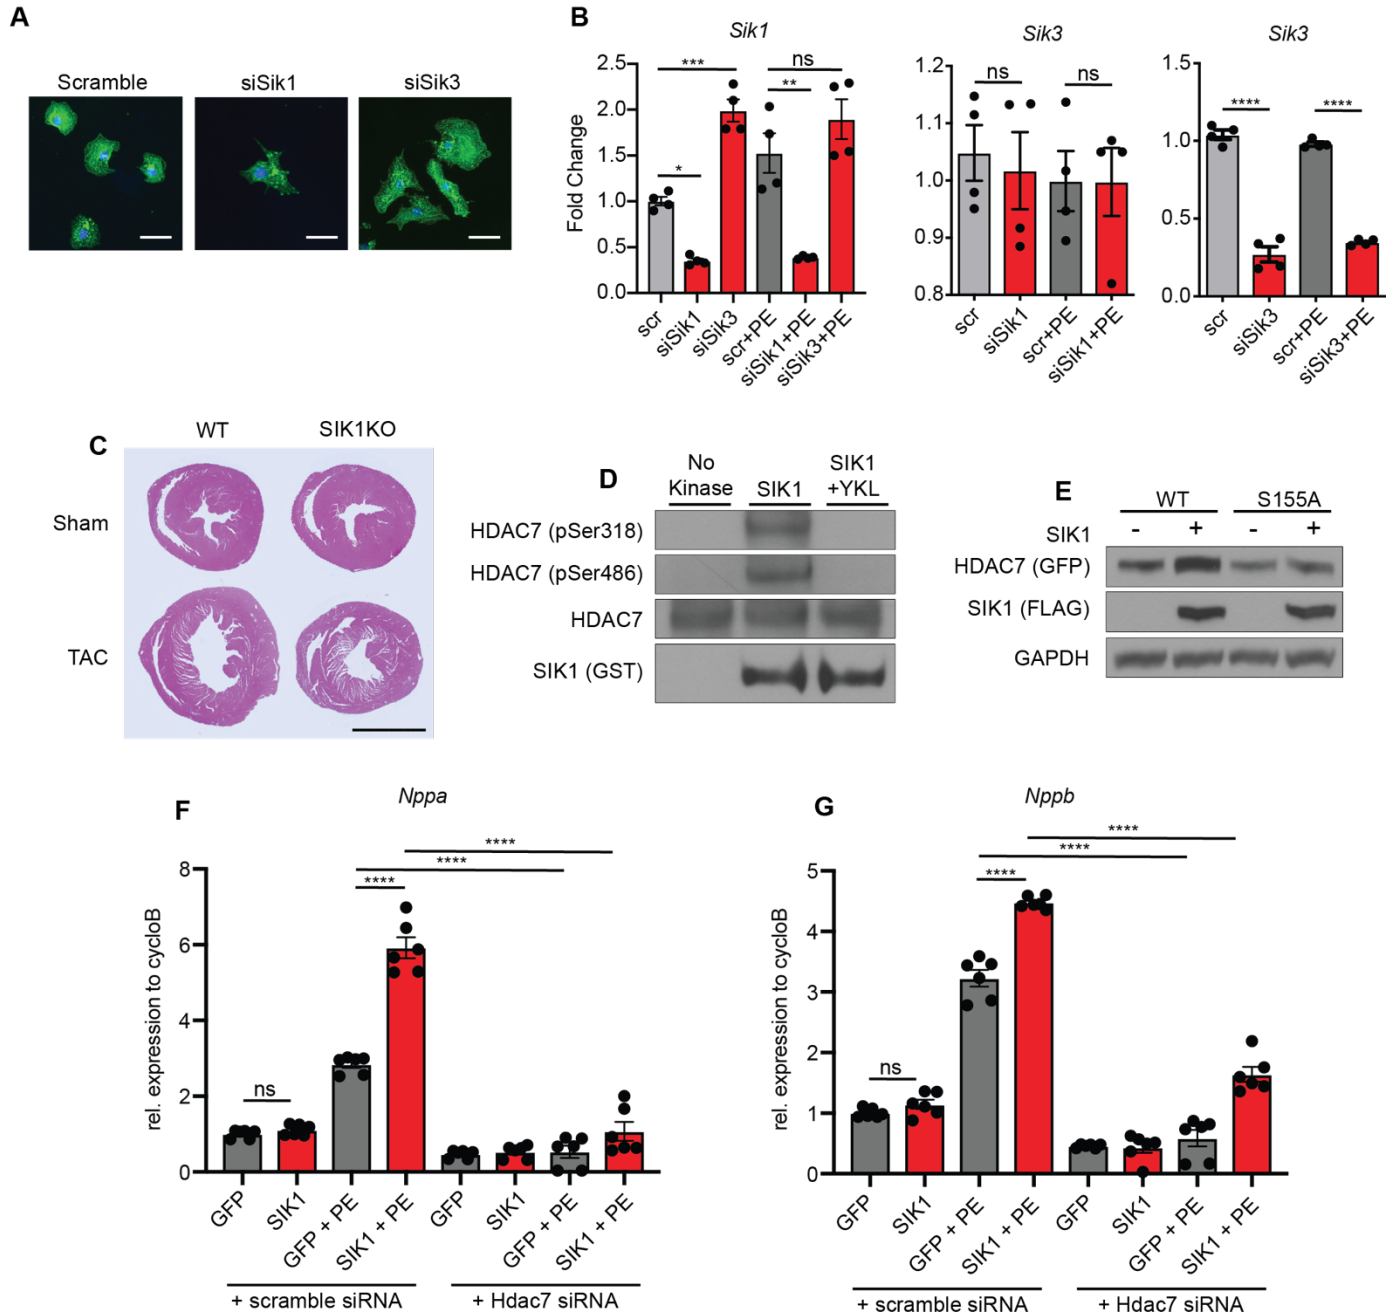

**Supplemental Figure 3:** (A, B) Western blotting for total and phosphorylated HDAC7 in NRVM treated with adenovirus expressing HDAC7 or GFP control.  $\alpha$ -tubulin used as loading control (representative western blots, n=3). (C) Western blotting of cytoplasmic (C) and nuclear (N) fractions of NRVM treated with 1 $\mu$ M YKL-05-099 + 5nM bortezomib (BZ). TATA-box binding protein (TBP) and GAPDH used as nuclear and cytoplasmic markers, respectively. (representative western blots, n=3). (D) qRT-PCR (n=5) and (E) western blotting (representative western blots, n=4) for c-Myc expression in WT and SIK1 KO sham/TAC left ventricular cardiac tissue. (F) qRT-PCR (n=6) and (G) western blotting (representative western blots, n=4) for c-Myc expression in NRVM infected with Ad-GFP or Ad-HDAC7 followed by transfection of siRNA against c-Myc or scramble control. Data are shown as means + SEM. \*P<0.05, \*\*P<0.01, \*\*\*P<0.001, \*\*\*\*P<0.0001 by one-way ANOVA with Tukey's multiple comparisons test.

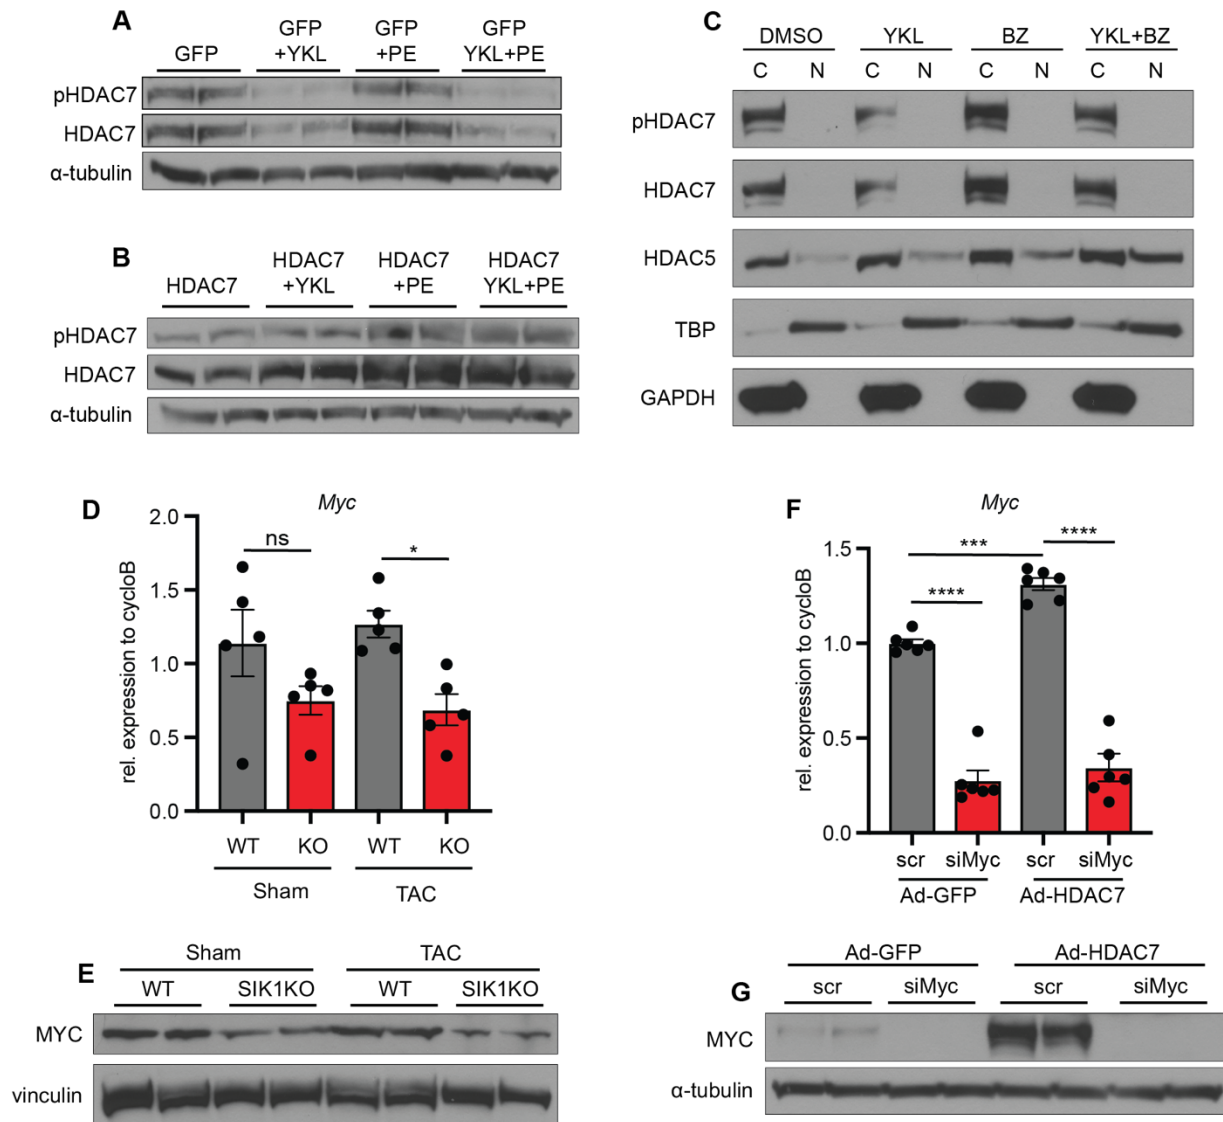

**Supplemental Figure 4:** (A) Immunoprecipitation of NRVM lysates with ubiquitin affinity beads followed by immunoblotting of HDAC7. NRVM were treated with YKL-05-099 (1 $\mu$ M) and bortezomib (5nM) (n=3). (B) Ratio of ubiquitinated-HDAC7 to total-HDAC7 (n=3). (C) Western blot for HDAC7 in NRVM infected with Ad-HA-14-3-3 or Ad-GFP followed by treatment with YKL-05-099 (1 $\mu$ M) (representative western blots, n=4). (D-F) Western blot for verification of SIK3 (D), HDAC5 (E), and HDAC7 (F) knockdown (representative western blots, n=4). Data are shown as means  $\pm$  SEM. \*P<0.05, \*\*P<0.01 by one-way ANOVA with Tukey's multiple comparisons test.

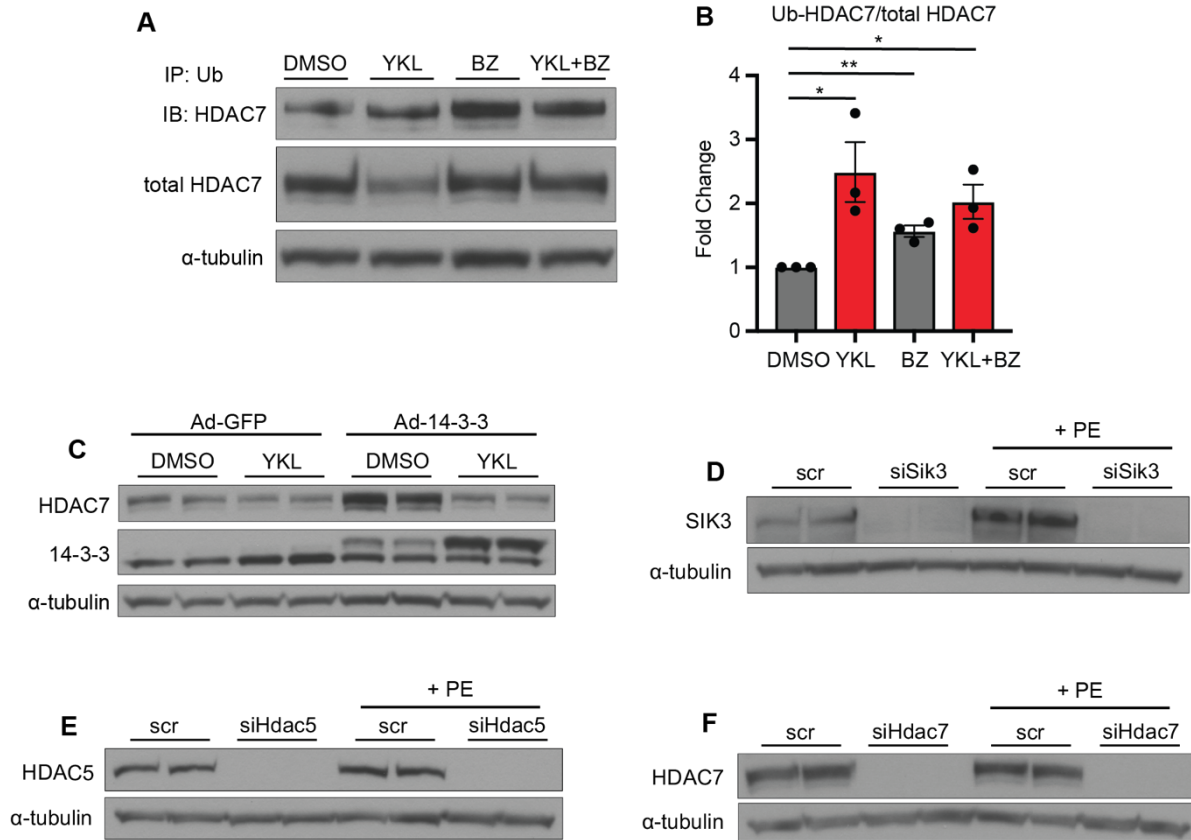

**Supplemental Table 1: List of qRT-PCR primers used***\*All probes are from the Roche Universal Probe Library*

| <b>Gene</b>  | <b>Species</b> | <b>Forward Primer</b>      | <b>Reverse Primer</b>    | <b>TaqMan Probe No.*</b> |
|--------------|----------------|----------------------------|--------------------------|--------------------------|
| <i>Nppa</i>  | Rat, Mouse     | CACAGATCTGATGGATTTCAAGA    | CCTCATCTTCTACCGGCATC     | #25                      |
| <i>Nppb</i>  | Rat            | GTCAGTCGCTTGGGCTGT         | CCAGAGCTGGGGAAAGAAG      | #13                      |
| <i>Ctgf</i>  | Rat            | GCTGACCTAGAGGAAAACATTAAGA  | CCGGTAGGTCTTCACACTGG     | #129                     |
| <i>Ilf6</i>  | Rat            | CCCTTCAGGAACAGCTATGAA      | ACAACATCAGTCCCAAGAAGG    | #20                      |
| <i>Ppib</i>  | Rat            | ACGTGGTTTTTCGGCAAAGT       | CTTGGTGTTCTCCACCTTCC     | #97                      |
| <i>Sik1</i>  | Rat, Mouse     | GCTCAACCCTCCTTGCATAA       | GTTCCCTCCGAGGGACTCA      | #63                      |
| <i>Sik2</i>  | Rat, Mouse     | TGCAGCCCCAGAAGTCTTT        | GAACAACCTCCATGCTCCAT     | #74                      |
| <i>Sik3</i>  | Rat, Mouse     | GTACCAGCAGGAGCAGCAC        | GGGCTGAGGAGGACAAATAGA    | #65                      |
| <i>Hdac7</i> | Rat            | TACCTGGCTGCTTTCAGGAT       | ACCAGGTCTGGAGCAAACCTC    | #9                       |
| <i>c-Myc</i> | Rat            | GCTCCTCGCGTTATTTGAG        | GCATCGTCGTGACTGTCTG      | #10                      |
| <i>Nppb</i>  | Mouse          | GTCAGTCGTTTGGGCTGTAAC      | AGACCCAGGCAGAGTCAGAA     | #71                      |
| <i>Ctgf</i>  | Mouse          | TGACCTGGAGGAAAACATTAAGA    | AGCCCTGTATGTCTTCACACTG   | #71                      |
| <i>Ilf6</i>  | Mouse          | GCTACCAAACCTGGATATAATCAGGA | CCAGGTAGCTATGGTACTCCAGAA | #6                       |
| <i>Ppib</i>  | Mouse          | TTCTTCATAACCACAGTCAAGACC   | ACCTTCCGTACCACATCCAT     | #20                      |

**Supplemental Table 2: List of TaqMan Gene Expression Assays used**

Human *B2M* and *NPPB* qRT-PCR were performed with pre-validated commercial TaqMan master mixes as detailed below:

| <b>Gene</b> | <b>Species</b> | <b>Taqman Assay ID</b> | <b>Vendor</b> | <b>Catalogue #</b> |
|-------------|----------------|------------------------|---------------|--------------------|
| <i>B2M</i>  | Human          | Hs00187842_m1          | ThermoFisher  | 4331182            |
| <i>NPPB</i> | Human          | Hs01057466_g1          | ThermoFisher  | 4331182            |
